# Supplementary material for: Electrocatalytic carboxylation of halogenated compounds with mesoporous silver electrode materials
Source: Royal Society of Chemistry journal article supplement (doi:10.1039/d1ra02563e), 2021-01-01
Supplement: d1ra02563e1.pdf [file d1ra02563e1.pdf]

## Supporting Information

# Electrocatalytic carboxylation of halogenated compounds with mesoporous silver electrode materials

Si-Li Shan, Cheng-Jie Jiang, Yu-Ting Liu, Jing-Jie Zhang, Huan Wang,\* and Jia-Xing Lu,\*

Shanghai Key Laboratory of Green Chemistry and Chemical Processes, School of Chemistry and  
Molecular Engineering, East China Normal University, Shanghai, 200062, China

## Experimental

### *1 Synthesis of mesoporous silver materials*

KIT-6 was synthesized following methods reported elsewhere [1]. HP-KIT-6 was synthesized by the method reported in one literature [2].

In order to synthesize mesoporous silver, a solution containing 1.48 g of  $\text{AgNO}_3$  (99% Aldrich), 1.13 g of ethanol and 1.13 g of distilled water was impregnated into 3.0 g of HP-KIT-6. After drying for 24 hours at 353 K, the samples were heated to 573 K in nitrogen flow for 2 hours. After the thermal decomposition process, the silica template was completely removed by treating the composite with 3 M NaOH solution at 273 K for three times. Finally, the mesoporous silver was washed with distilled water and acetone for several times and dried at room temperature. This material named mesoAg-1 was obtained.

The amount of  $\text{AgNO}_3$ , ethanol and distilled water was reduced to 0.9 times, 0.8 times, 0.7 times and 0.6 times of the above amount, while other preparation conditions remained unchanged. The other four mesoporous silver materials were named mesoAg-2, mesoAg-3, mesoAg-4 and mesoAg-5.

### *2 Preparation of electrode and electrocatalytic reaction*

60 mg of mesoporous silver was mixed with 0.1 mL of sodium carboxymethyl cellulose (CMC sodium to water ratio was 1:100) and coated on both sides of carbon paper (2 cm × 2 cm). After drying, the cathode was prepared and its electrocatalytic performance was tested.

A series of galvanostatic electrolysis of five kinds of mesoporous silver modified electrodes was carried out with 15 mL of 0.1 M bromobenzyl-0.1 M TEABr-DMF organic solution in an undivided electrochemical cell. The two-electrode system consisted of a mesoporous silver modified electrode as a cathode and a Mg rod as a sacrificial anode.

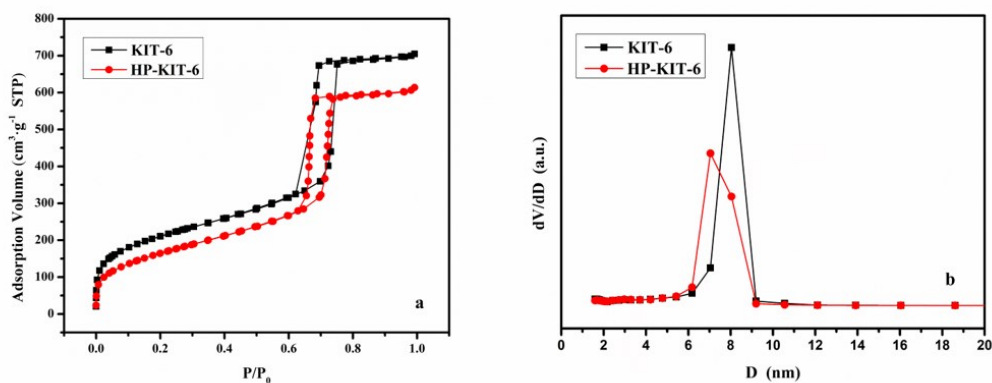

**Fig. S1.** (a)  $N_2$  adsorption-desorption isotherms; (b) pore size distributions

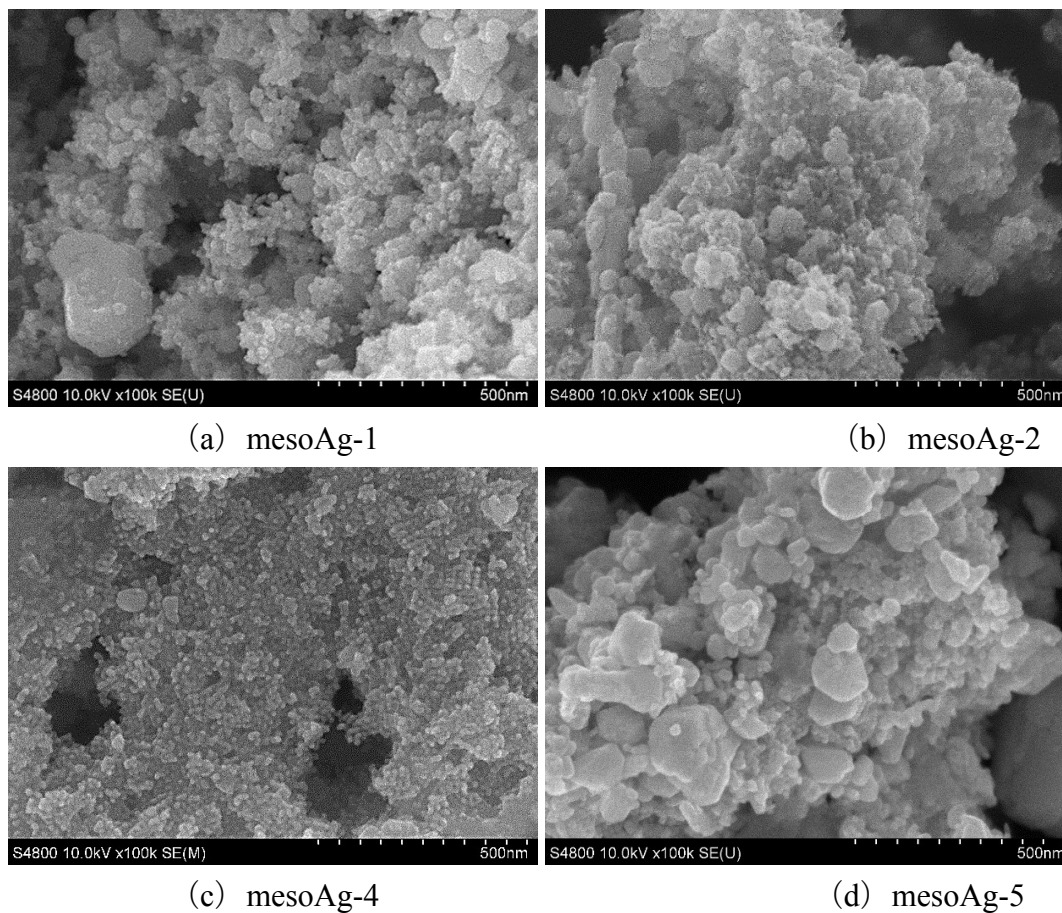

(a) mesoAg-1 (b) mesoAg-2 (c) mesoAg-4 (d) mesoAg-5

**Fig. S2.** SEM images for mesoporous silver materials

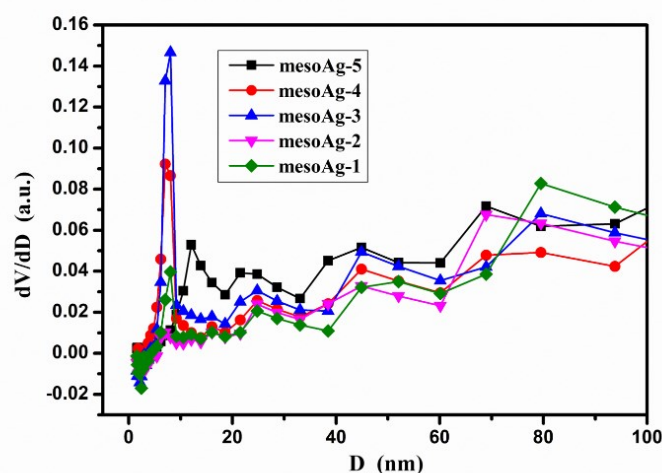

**Fig. S3.** BJH pore size distribution curve for the mesoporous silver materials

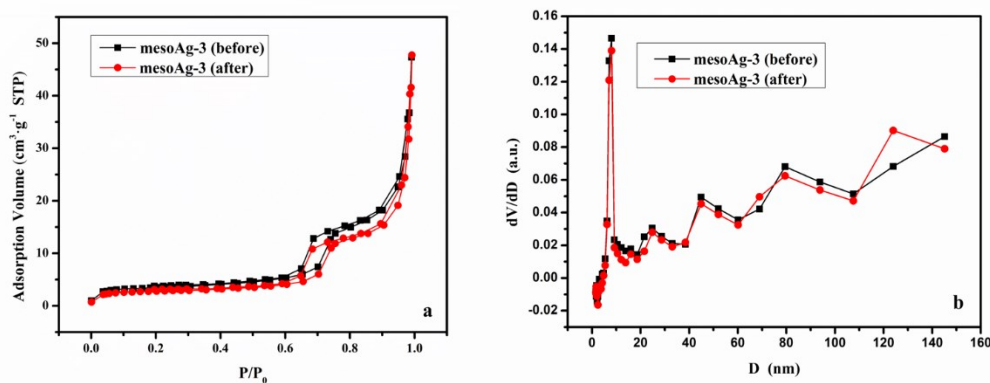

**Fig. S4.** (a) N<sub>2</sub> adsorption-desorption isotherms; (b) pore size distributions of mesoAg-3 before and after use.

**Table S1** Physicochemical properties of mesoporous materials

| Materials <sup>a</sup> | Organic content <sup>b</sup><br>(wt%) | BET surface area <sup>c</sup><br>(m <sup>2</sup> ·g <sup>-1</sup> ) | Total pore volume <sup>d</sup><br>(cm <sup>3</sup> ·g <sup>-1</sup> ) | Average pore size <sup>e</sup><br>(nm) |
|------------------------|---------------------------------------|---------------------------------------------------------------------|-----------------------------------------------------------------------|----------------------------------------|
| KIT-6                  |                                       | 762                                                                 | 1.09                                                                  | 8.0                                    |
| HP-KIT-6               | 3.7                                   | 605                                                                 | 0.95                                                                  | 7.1                                    |

<sup>a</sup> HP-KIT-6 denote hydrophobic KIT-6.

<sup>b</sup> Organic contents obtained by TGA analysis (weight loss between 473K and 873K).

<sup>c</sup> BET surface areas calculated from the N<sub>2</sub> adsorption branches in the range of relative pressure ( $p/p_0$ ) = 0.05 – 0.20.

<sup>d</sup> Total pore volumes measured at  $p/p_0 = 0.99$ .

<sup>e</sup> Pore diameters obtained from N<sub>2</sub> adsorption branches by BJH method.

**Table S2** Structure parameters for Ag

| Material             | BET surface area <sup>a</sup> (m <sup>2</sup> ·g <sup>-1</sup> ) |
|----------------------|------------------------------------------------------------------|
| silver nanoparticles | 1.94                                                             |
| foam silver          | 1.50                                                             |

<sup>a</sup> BET surface areas calculated from the N<sub>2</sub> adsorption branches in the range of relative pressure ( $p/p_0$ ) = 0.05 – 0.20.

**Table S3** Structure parameters for mesoporous Ag before and after use

| Material             | BET surface area <sup>a</sup><br>(m <sup>2</sup> ·g <sup>-1</sup> ) | Total pore volume <sup>b</sup><br>(cm <sup>3</sup> ·g <sup>-1</sup> ) | Average pore size <sup>c</sup><br>(nm) |
|----------------------|---------------------------------------------------------------------|-----------------------------------------------------------------------|----------------------------------------|
| mesoAg-3<br>(before) | 12                                                                  | 0.07                                                                  | 8.0                                    |
| mesoAg-3<br>(after)  | 10                                                                  | 0.07                                                                  | 8.0                                    |

<sup>a</sup> BET surface areas calculated from the N<sub>2</sub> adsorption branches in the range of relative pressure ( $p/p_0$ ) = 0.05 – 0.20. <sup>b</sup> Total pore volumes measured at  $p/p_0$  = 0.99.

<sup>c</sup> Pore diameters obtained from N<sub>2</sub> adsorption branches by BJH method.

**References:**

- [1] Kim, T.-W. , Kleitz, F., Paul, B., Ryoo, R. MCM-48-like large mesoporous silicas with tailored pore structure: facile synthesis domain in a ternary triblock copolymerbutanolwater system. *J. Am. Chem. Soc.*, 2005, 127(20), 7601-7610.
- [2] Shon, J. K. , Kong, S. S. , Kim, J. M. , Ko, C. H. , Jin, M. , Lee, Y. Y. , et al. Facile synthesis of highly ordered mesoporous silver using cubic mesoporous silica template with controlled surface hydrophobicity. *Chem. Commun.*, 2009, 45(6), 650-652.
